# Supplementary material
Source: publisher figshare collection journal article supplement (https://future-science-group.figshare.com/ndownloader/files/35500976)
Supplement: Supplementary file 1 [file 35500976]

**Table 1: Drug-to-lipid lipid concentration at associated drug concentrations.**

| **TFV Concentration (mg/mL)** | **Lipid Concentration (%)** | | | |
| --- | --- | --- | --- | --- |
| **1:4 ND** | **1:5 ND** | **1:7.3 ND** | **1:20 ND** |
| **0.01** | 0.017 | 0.021 | 0.031 | 0.085 |
| **0.05** | 0.085 | 0.106 | 0.155 | 0.426 |
| **0.0625** | 0.106 | 0.133 | 0.194 | 0.532 |
| **0.075** | 0.128 | 0.160 | 0.233 | 0.639 |
| **0.1** | 0.170 | 0.213 | 0.311 | 0.852 |
